# Supplementary material for: Antioxidant and DNA-Protective Activity of an Extract Originated from Kalamon Olives Debittering
Source: MDPI journal article supplement (doi:10.3390/antiox12020333), 2023-01-31
Supplement: s1 [file s1]

**Table S2.** Tail parameters of DNA damage using Comet assay in C2C12 cells, treated with 40 µg/mL of brine extract in the absence or presence of 250 µM H<sub>2</sub>O<sub>2</sub>. Data are presented as mean ± SEM.

| Treatments                            | Tail moment | Fold change | Tail length  | Fold change | %DNA tail   | Fold change |
|---------------------------------------|-------------|-------------|--------------|-------------|-------------|-------------|
| control                               | 0.42 ± 0.11 | 1.00        | 13.90 ± 1.57 | 1.00        | 2.03 ± 0.48 | 1.00        |
| H <sub>2</sub> O <sub>2</sub>         | 5.16 ± 1.03 | 12.28       | 29.33 ± 3.36 | 2.11        | 6.40 ± 1.12 | 3.15        |
| BE                                    | 0.48 ± 0.10 | 1.14        | 14.92 ± 1.51 | 1.07        | 1.31 ± 0.22 | 0.64        |
| BE<br>+ H <sub>2</sub> O <sub>2</sub> | 1.16 ± 0.34 | 2.76        | 18.47 ± 2.61 | 1.32        | 2.04 ± 0.38 | 1.01        |

BE: brine extract
