# Supplementary material for: Antioxidant and DNA-Protective Activity of an Extract Originated from Kalamon Olives Debittering
Source: MDPI journal article supplement (doi:10.3390/antiox12020333), 2023-01-31
Supplement: s1 [file s1]

**Table S1.** Tail parameters of DNA damage using Comet assay in EA.hy296 cells, treated with 40 µg/mL of brine extract in the absence or presence of 250 µM H<sub>2</sub>O<sub>2</sub>. Data are presented as mean ± SEM.

| Treatments                            | Tail moment  | Fold change of the Averages | Tail length  | Fold change | %DNA tail    | Fold change |
|---------------------------------------|--------------|-----------------------------|--------------|-------------|--------------|-------------|
| control                               | 0.34 ± 0.11  | 1.00                        | 8.57 ± 1.10  | 1.00        | 1.28 ± 0.29  | 1.00        |
| H <sub>2</sub> O <sub>2</sub>         | 21.69 ± 3.02 | 63.79                       | 67.16 ± 5.08 | 7.84        | 19.26 ± 1.87 | 15.05       |
| BE                                    | 4.35 ± 1.60  | 12.79                       | 25.57 ± 4.44 | 2.98        | 4.04 ± 1.17  | 3.15        |
| BE<br>+ H <sub>2</sub> O <sub>2</sub> | 4.33 ± 1.10  | 12.73                       | 30.30 ± 3.18 | 3.53        | 6.42 ± 1.43  | 5.01        |

BE: brine extract
